# Supplementary material for: CdSe/ZnS core–shell quantum dots charge trapping layer for flexible photonic memory
Source: Royal Society of Chemistry journal article supplement (doi:10.1039/c4tc01901f), 2015-01-01
Supplement: c4tc01901f1.pdf [file c4tc01901f1.pdf]

## Supporting Information

### **CdSe/ZnS core-shell quantum dots charge trapping layer for flexible photonic memory**

*Su-Ting Han,<sup>a</sup> Ye Zhou,<sup>a</sup> Li Zhou,<sup>a</sup> Yan Yan<sup>a</sup>, Long-Biao Huang<sup>a</sup>, Wei Wu<sup>a,b</sup> and V. A. L. Roy<sup>\*a,c</sup>*

<sup>a</sup> Department of Physics and Materials Science and Center of Super-Diamond and Advanced Films (COSDAF), City University of Hong Kong, Hong Kong SAR

E-mail: [val.roy@cityu.edu.hk](mailto:val.roy@cityu.edu.hk)

<sup>b</sup> Laboratory of Printable Functional Nanomaterials and Printed Electronics, School of Printing and Packaging, Wuhan University, Wuhan 430072, P. R. China

<sup>c</sup> Shenzhen Research Institute, City University of Hong Kong, High-Tech Zone, Nanshan District, Shenzhen, 518057, China

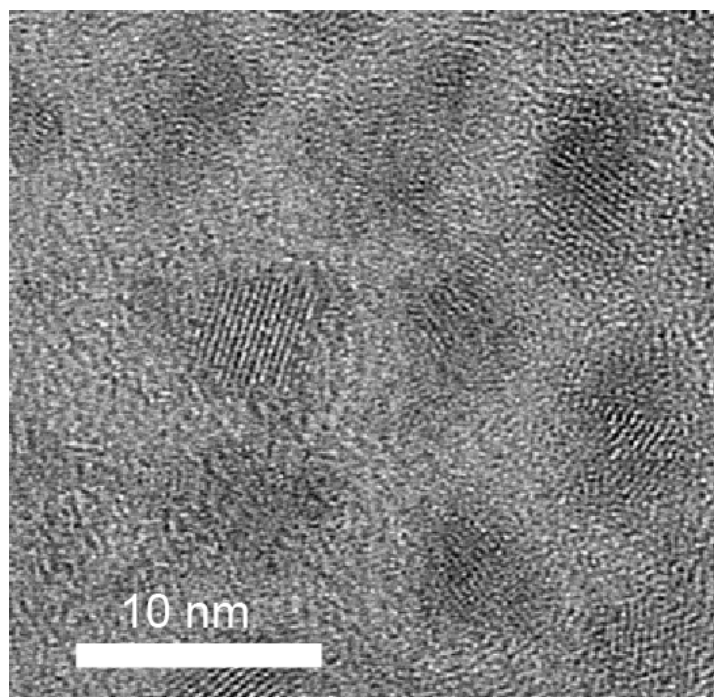

**Fig. S1** HRTEM image of CdSe/ZnS core-shell NPs.

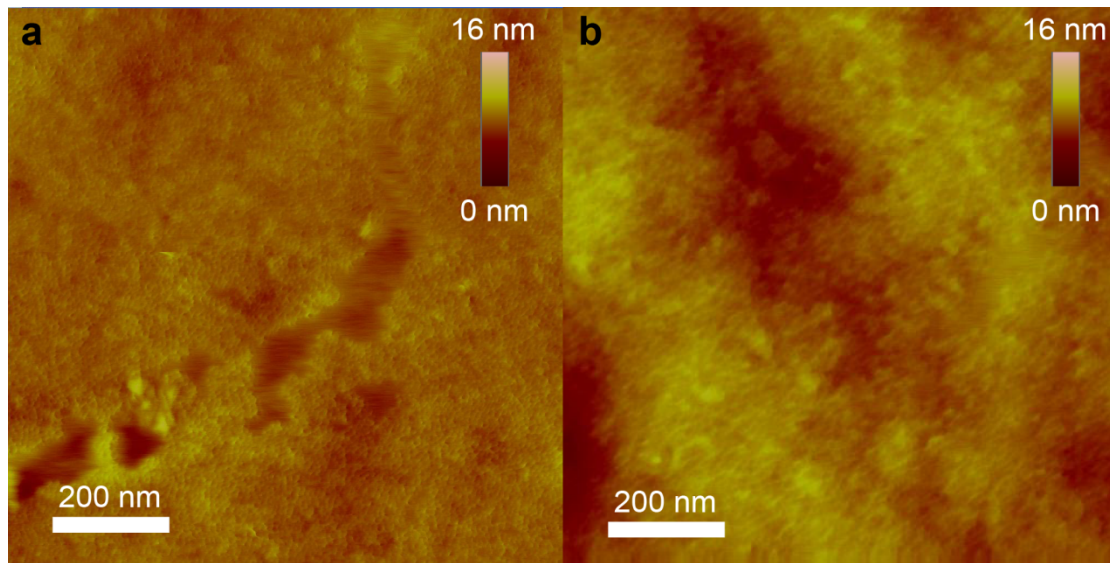

**Fig. S2** The AFM images of CdSe/ZnS nanoparticles spin-coated onto (a) PVA layer and (b) Al<sub>2</sub>O<sub>3</sub> layer.

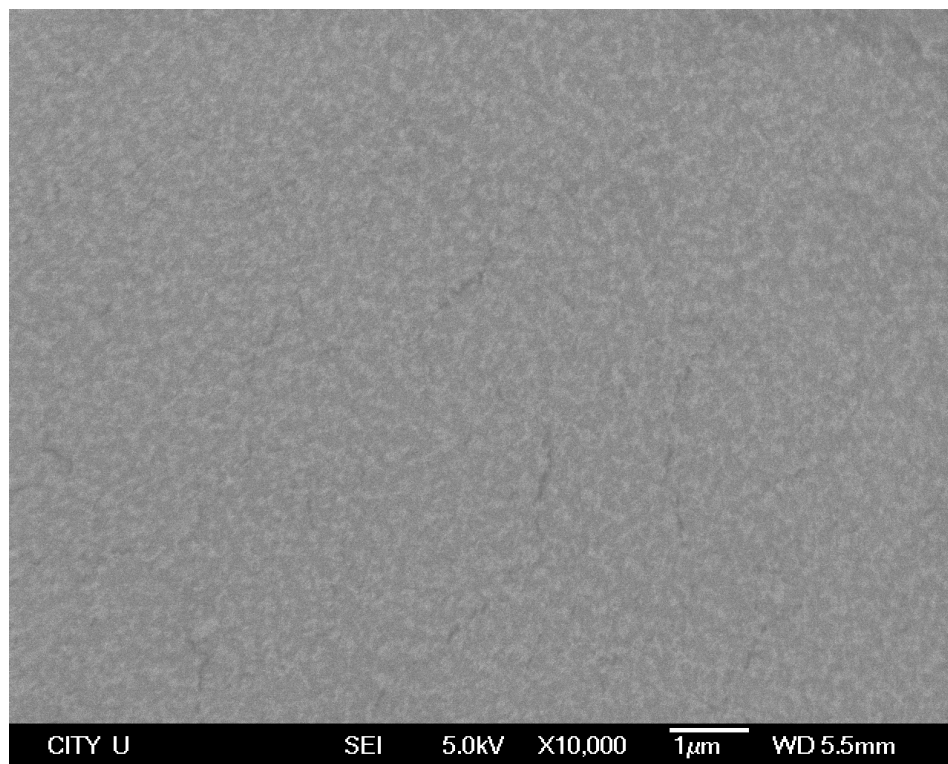

**Fig. S3** The SEM images of CdSe/ZnS nanoparticles spin-coated onto PVA layer.

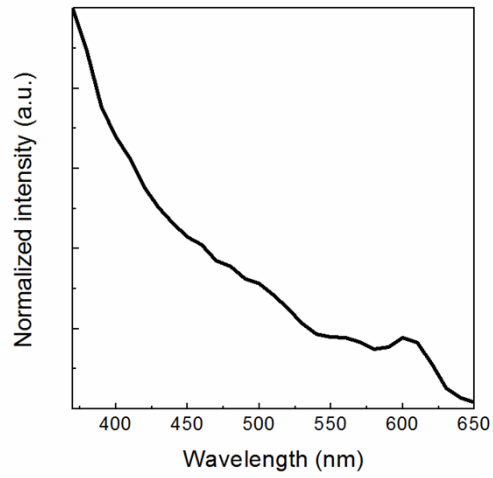

Figure S4. UV-visible absorption spectrum of CdSe/ZnS nanoparticle monolayer.

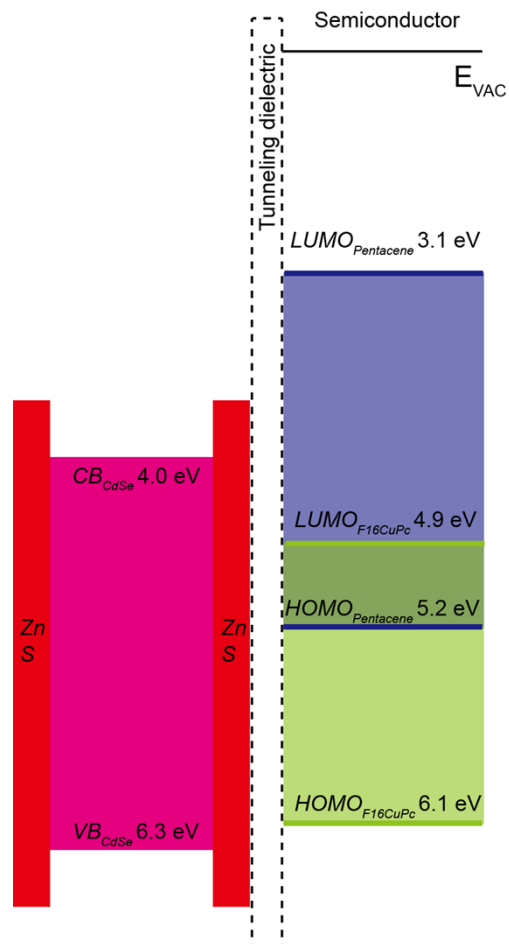

Figure S5. Energy level alignment of photonic memory devices.
